# Supplementary material
Source: Springer Nature journal article supplement (https://www.springermedizin.de/resource/supplementary/12885_2009_1773_MOESM1_ESM.pdf/9472898)

A

## Stage III or IV

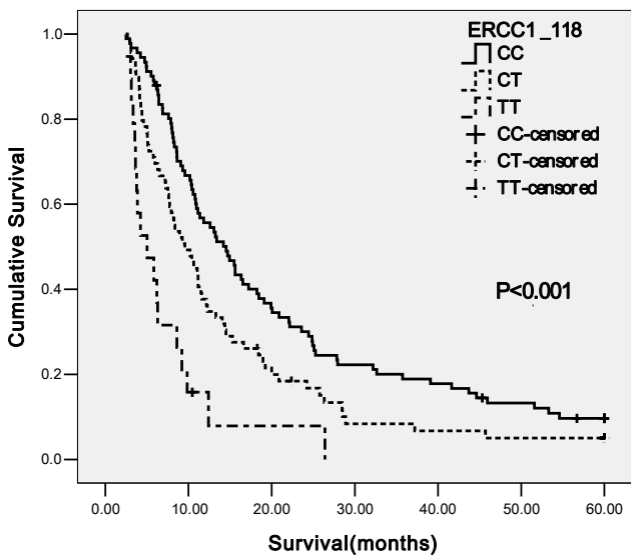

B

## Stage III or IV

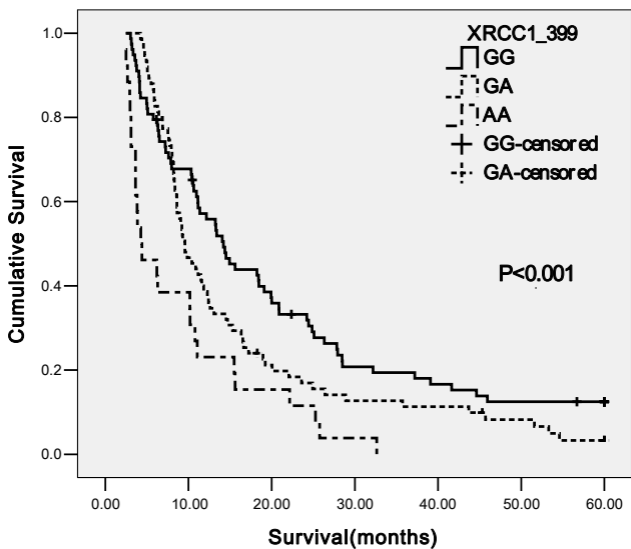

Supplement: MOESM1 [file 9472898]
